# Supplementary material for: Fast one-step fabrication of a vertically-ordered mesoporous silica-nanochannel film on graphene for direct and sensitive detection of doxorubicin in human whole blood
Source: Royal Society of Chemistry journal article supplement (doi:10.1039/d0tc00744g), 2020-01-01
Supplement: d0tc00744g1.pdf [file d0tc00744g1.pdf]

Supporting Information to

# **Fast and one-step fabrication of vertically-ordered mesoporous silica-nanochannel film on graphene for direct and sensitive detection of doxorubicin in human whole blood**

Fei Yan,<sup>a,‡</sup> Jie Chen,<sup>b,‡</sup> Qifan Jin,<sup>a</sup> Huaxu Zhou,<sup>a</sup> Ajab Khan Sailjoi,<sup>a</sup> Jiyang Liu,<sup>a,\*</sup> Weizhong

Tang<sup>b,\*</sup>

<sup>a</sup> Department of Chemistry, Zhejiang Sci-Tech University, 928 Second Avenue, Xiasha Higher Education Zone, Hangzhou, 310058, PR China

<sup>b</sup> Guangxi Medical University, 22 Shuangyong Road, Nanning 530021, PR China

‡ These two authors contributed equally

\* Corresponding author. E-mail: [tangweizhong@gxmu.edu.cn](mailto:tangweizhong@gxmu.edu.cn); [liujy@zstu.edu.cn](mailto:liujy@zstu.edu.cn)

## **Table of Contents**

### **S1. Molecular structure of DOX**

### **S2. Preparation and Characterizations of VMSF/ErGO/GCE**

S2.1 *i-t* response of the preparation of VMSF/GCE and VMSF/ErGO/GCE by EASA

S2.2 Raman of GO and ErGO

S2.3 Stability of VMSF/ErGO/GCE

S2.4 EIS characterization of VMSF/ErGO/GCE

### **S3. CVs of DOX at the VMSF/APTES/GCE and VMSF/GCE**

### **S4. The effect of scan rate on the CV responses**

### **S5. CVs of APAP, Trp and UA at the VMSF/ErGO/GCE**

### **S6. Optimized conditions for electrochemical detection**

S6.1 Applied potential and applied time

S6.2 pH of supporting electrolyte

S6.3 Preconcentration time

## **S7. Comparison of various electrodes for electrochemical detection of DOX**

## S1. Molecular structure of DOX

Scheme S1. Molecular structure of DOX.

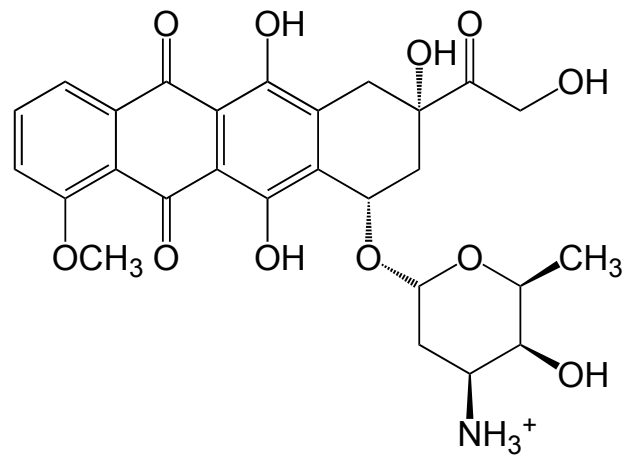

## S2. Preparation and Characterizations of VMSF/ErGO/GCE

### S2.1 $i-t$ response of the preparation of VMSF/GCE and VMSF/ErGO/GCE by EASA

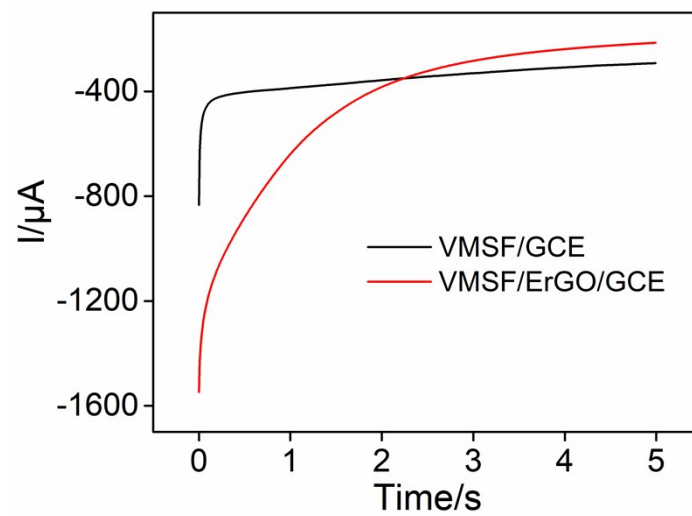

**Fig. S1** The  $i-t$  curves of the preparation of VMSF/GCE and VMSF/ErGO/GCE by EASA method. The applied potential was  $-2.2$  V.

## S2.2 Raman of GO and ErGO

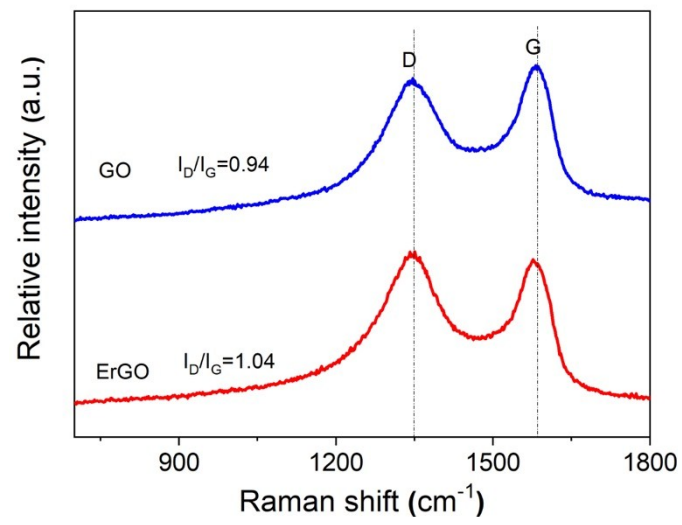

**Fig. S2** Raman spectra of GO and ErGO.

### S2.3 Stability of VMSF/ErGO/GCE

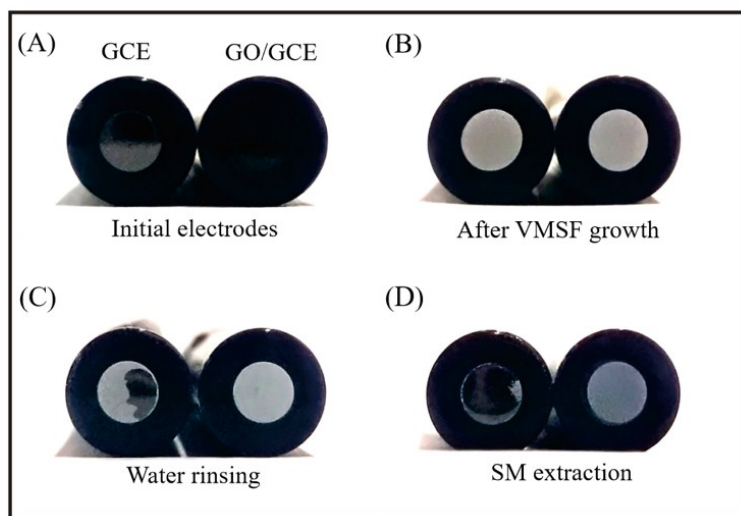

**Fig. S3** Photographs of bare GCE and GO/GCE (a), SM@VMSF/GCE and SM@VMSF/ErGO/GCE before (b) and after rinsing by water (c) or HCl-ethanol solution (d). VMSF/GCE and VMSF/ErGO/GCE were obtained after the removal of SM from nanochannels by using HCl-ethanol solution.

### S2.3 EIS characterization of VMSF/ErGO/GCE

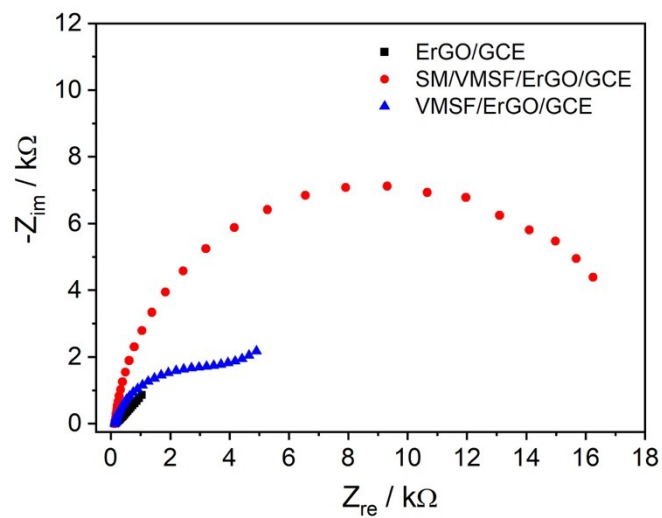

**Fig. S4** EIS plots of ErGO/GCE, SM/VMSF/ErGO/GCE and VMSF/ErGO/GCE. EIS experiments were conducted in 0.05 M M KHP solution containing 2.5 mM K<sub>3</sub>Fe(CN)<sub>6</sub> and 2.5 mM K<sub>4</sub>Fe(CN)<sub>6</sub>.

### S3. CVs of DOX at the VMSF/APTES/GCE and APTES/GCE

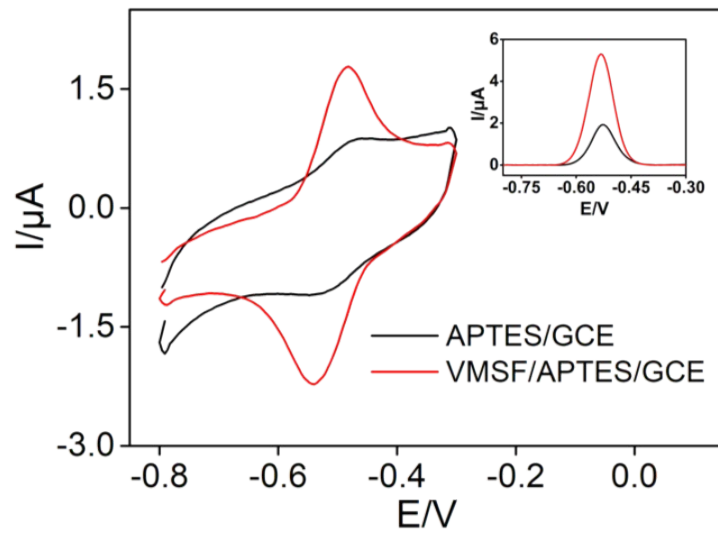

**Fig. S5** CV curves obtained from APTES/GCE and VMSF/APTES/GCE in 0.1 M PBS (pH = 6.0) containing 10  $\mu\text{M}$  DOX. The inset was the corresponding DPV curves.



#### S4. The effect of scan rate on the CV responses

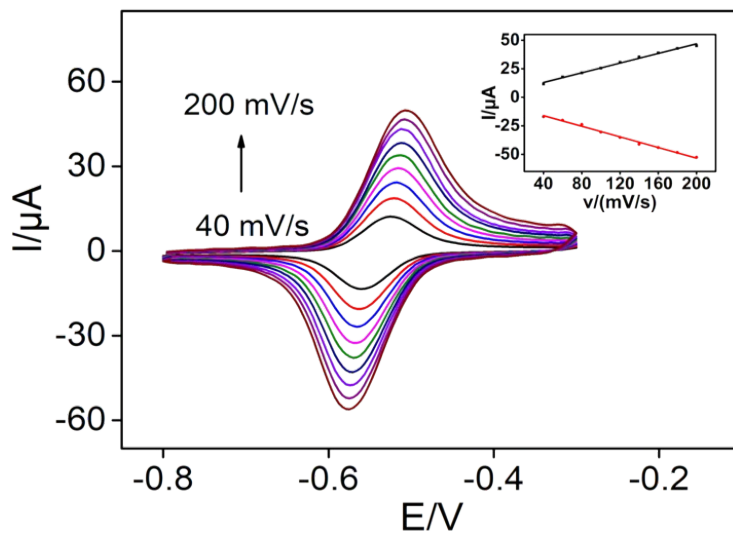

**Fig. S6** CV curves obtained from VMSF/ErGO/GCE in PBS (0.1 M, pH 6.0) containing 10  $\mu\text{M}$  DOX at different scan rates. The inset was the dependence of anodic and cathodic peak potential on scan rate.

### S5. CVs of APAP, Trp and UA at the VMSF/ErGO/GCE

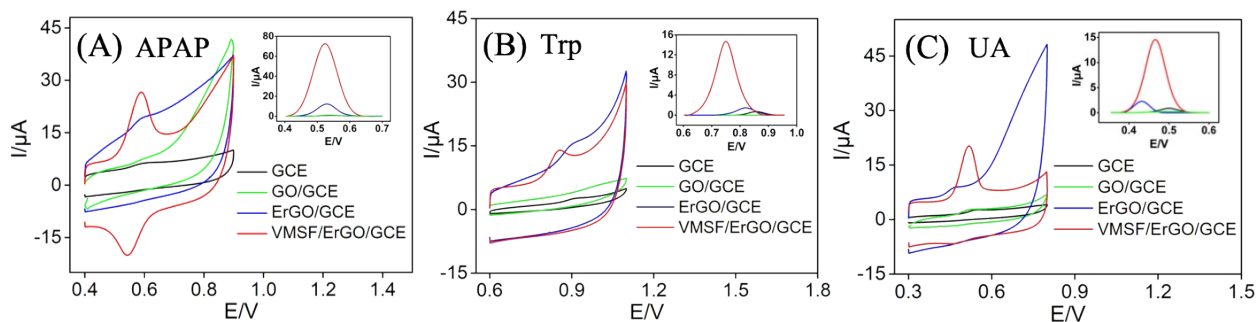

**Fig. S7** CV curves of 20  $\mu\text{M}$  APAP (A), Trp (B) and UA (C) at the GCE, GO/GCE, ErGO/GCE, and VMSF/ErGO/GCE in 0.1 M PBS solution (pH = 4.0). The scan rate was 100 mV/s. The insets were corresponding DPV curves.

## S6. Optimized conditions for electrochemical detection

### S6.1. Applied potential and applied time

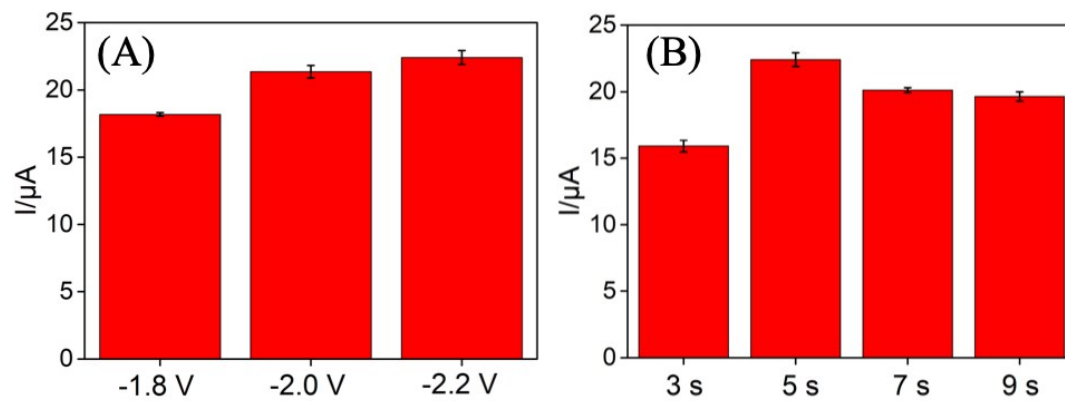

**Fig. S8** Effect of applied potential (A) and applied time (B) on the current response of 3  $\mu\text{M}$  DOX in PBS (0.1 M, pH 6.0). In (A) applied time 5 s; in (B) applied potential -2.2 v.

## S6.2 pH of supporting electrolyte

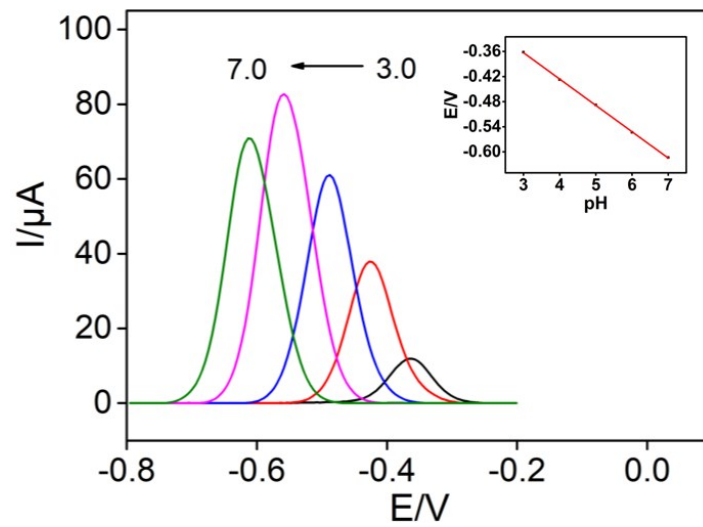

**Fig. S9** DPV curves for VMSF/ErGO/GCE in 0.1 M PBS containing 10  $\mu\text{M}$  DOX at various pH values. The inset shows the linear dependence of anodic peak potential ( $E$ ) on pH value.

### S6.3 Preconcentration time

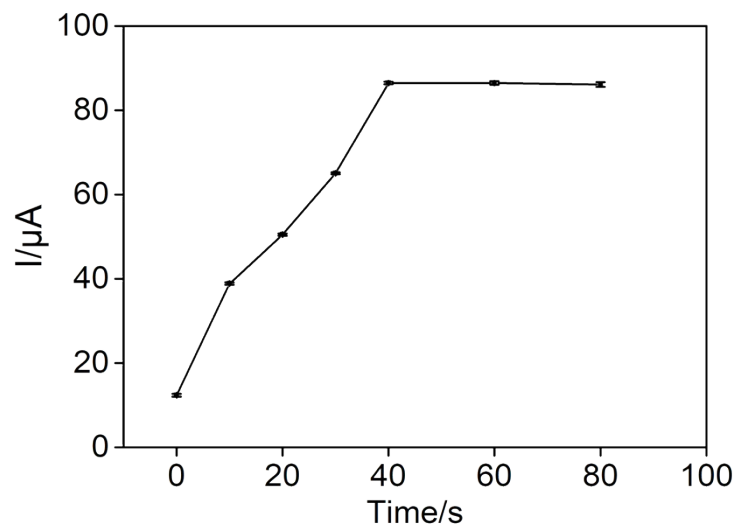

**Fig. S10** Influence of the stirring time on the current response of 10  $\mu\text{M}$  DOX in 0.1 M PBS (pH = 6.0). The error bars represent the standard deviations of three measurements.

## S7. Comparison of various electrodes for electrochemical detection of DOX

**Table S1.** Comparison of the analytical performance of the VMSF/ErGO/GCE with other electrodes for the electrochemical detection of DOX in PBS solution

| Electrode      | Sensitivity<br>( $\mu\text{A}/\mu\text{M}$ ) | Range<br>( $\mu\text{M}$ ) | LOD<br>(nM) | <i>R</i> |
|----------------|----------------------------------------------|----------------------------|-------------|----------|
| VMSF/ErGO/GCE  | 7.815                                        | 0.001–20                   | 0.77        | 0.9993   |
| ErGO/GCE       | 2.422                                        | 0.5–20                     | 33.5        | 0.9995   |
| GCE            | 0.6168                                       | 1–15                       | 532         | 0.9991   |
| VMSF/APTES/GCE | 0.4753                                       | 1–20                       | 623         | 0.9968   |
